# Supplementary material for: Cd1−xZnxO [0.05 ≤x≤ 0.26] synthesized by vapor-diffusion induced hydrolysis and co-nucleation from aqueous metal salt solutions
Source: Royal Society of Chemistry journal article supplement (doi:10.1039/c0dt01558j), 2011-01-01
Supplement: c0dt01558j.pdf [file c0dt01558j.pdf]

Electronic Supplementary Information for Dalton Transactions

This journal is © The Royal Society of Chemistry 2011

**Supporting Information for**

“Cd<sub>1-x</sub>Zn<sub>x</sub>O [0.05 ≤ x ≤ 0.26] Synthesized by Vapor-diffusion Induced Hydrolysis and Co-nucleation from Aqueous Metal Salt Solutions”

*Birgit Schwenzer, James R. Neilson, Stacie M. Jeffries, and Daniel E. Morse*

Institute for Collaborative Biotechnologies, California NanoSystems Institute and the Materials Research Laboratory, University of California, Santa Barbara, CA 93106, U.S.A.; Corresponding Author e-mail: [d\\_morse@lifesci.ucsb.edu](mailto:d_morse@lifesci.ucsb.edu)

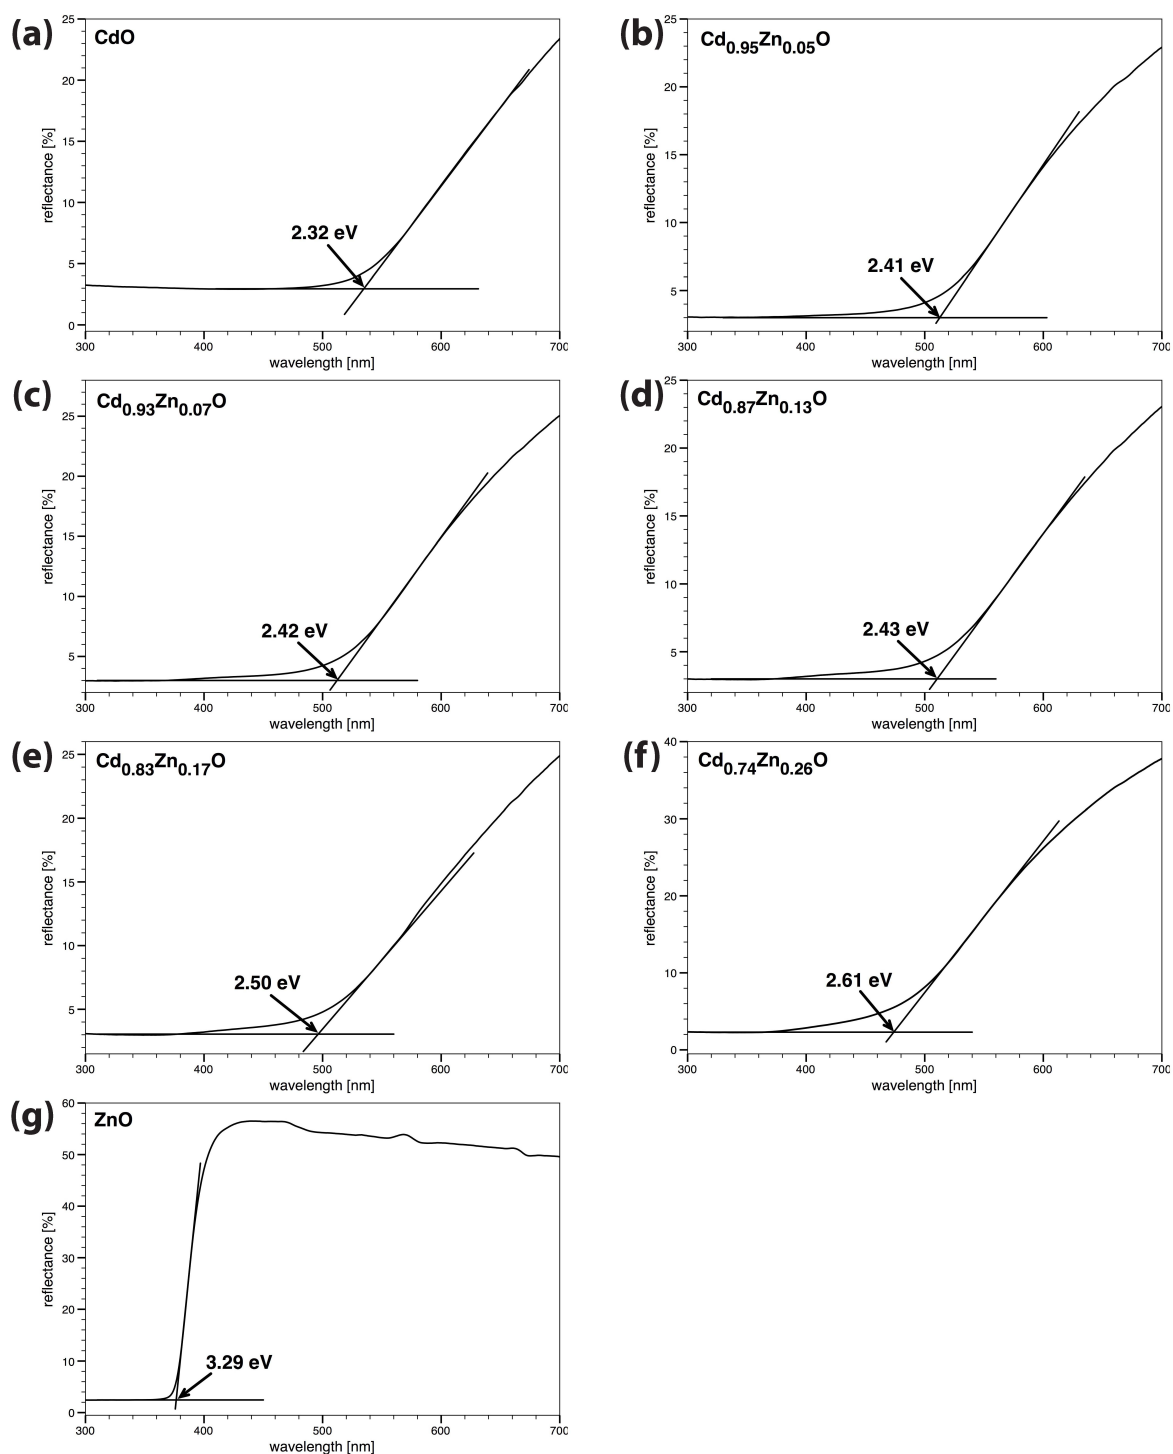

**Figure S1.** UV/Vis spectra for a) CdO (2.32 eV), b) Cd<sub>0.95</sub>Zn<sub>0.05</sub>O (2.41 eV), c) Cd<sub>0.93</sub>Zn<sub>0.07</sub>O (2.42 eV), d) Cd<sub>0.87</sub>Zn<sub>0.13</sub>O (2.43 eV), e) Cd<sub>0.83</sub>Zn<sub>0.17</sub>O (2.50 eV), f)

$\text{Cd}_{0.74}\text{Zn}_{0.26}\text{O}$  (2.61 eV) and g)  $\text{ZnO}$  (3.29 eV). Tangents indicate method for determination of band gap of the nanostructured materials.

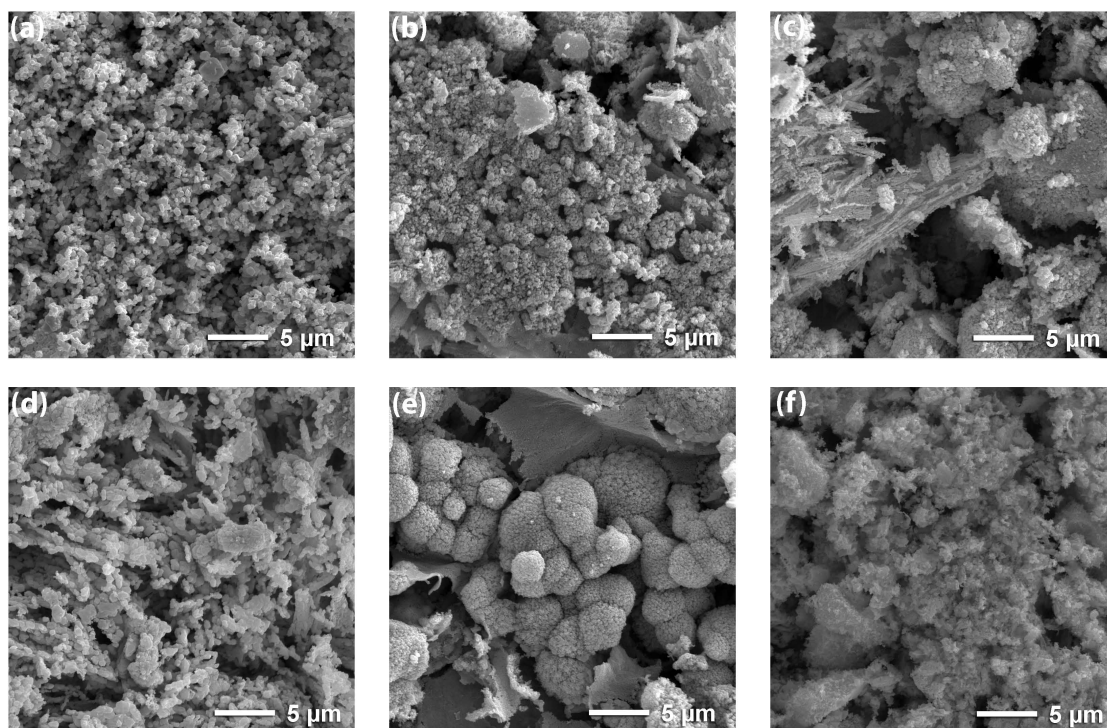

**Figure S2.** Scanning electron microscopy images of a)  $\text{CdO}$ , b)  $\text{Cd}_{0.95}\text{Zn}_{0.05}\text{O}$ , c)  $\text{Cd}_{0.93}\text{Zn}_{0.07}\text{O}$ , d)  $\text{Cd}_{0.87}\text{Zn}_{0.13}\text{O}$ , e)  $\text{Cd}_{0.83}\text{Zn}_{0.17}\text{O}$ , and f)  $\text{Cd}_{0.74}\text{Zn}_{0.26}\text{O}$  illustrating the inhomogeneous morphology on the micrometer scale for these bimetallic oxide materials.

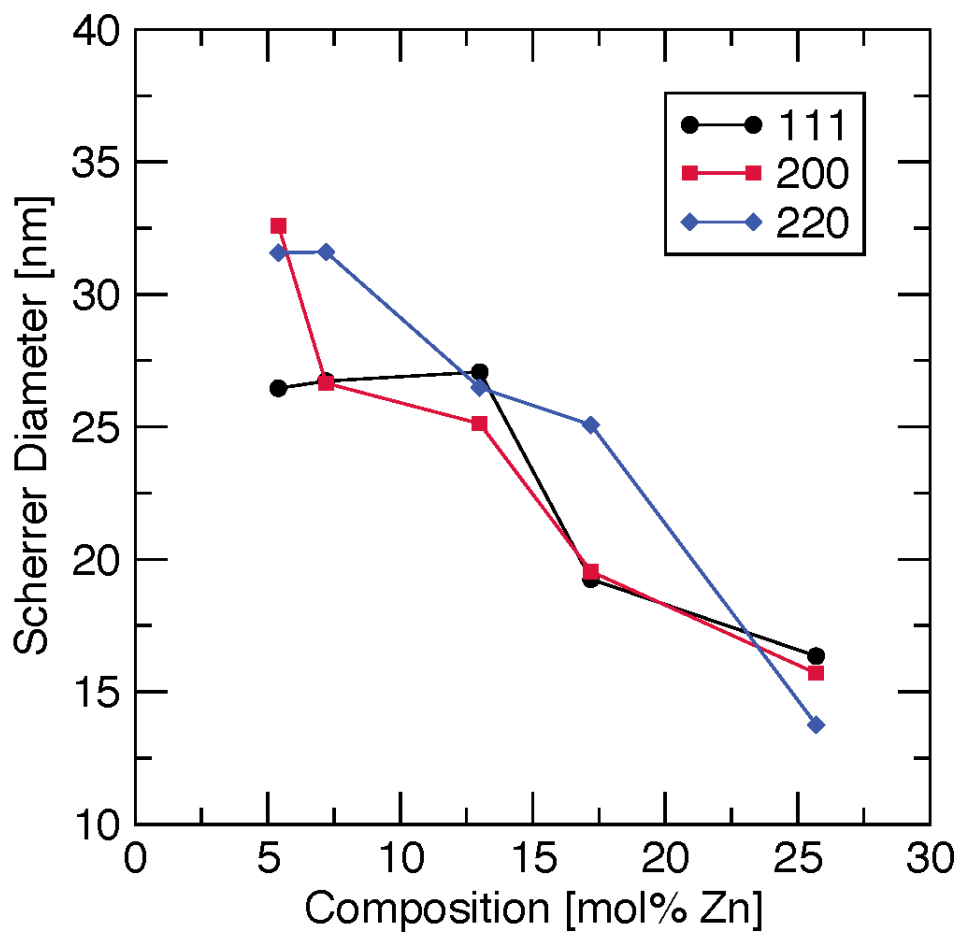

**Figure S3.** Crystalline correlations lengths of the  $\text{Cd}^{2+}$ -containing cubic phase in the mixed metal oxide samples  $\text{Cd}_{0.95}\text{Zn}_{0.05}\text{O}$ ,  $\text{Cd}_{0.93}\text{Zn}_{0.07}\text{O}$ ,  $\text{Cd}_{0.87}\text{Zn}_{0.13}\text{O}$ ,  $\text{Cd}_{0.83}\text{Zn}_{0.17}\text{O}$ , and  $\text{Cd}_{0.74}\text{Zn}_{0.26}\text{O}$  as determined from the X-ray reflections 111, 200, and 220, respectively, using the Scherrer formula.
